# Supplementary material
Source: PubMed Central journal article supplement (PMC6216022)
Supplement: NIHMS994389-supplement-1.pdf [file NIHMS994389-supplement-1.pdf]

1 Supplemental figure

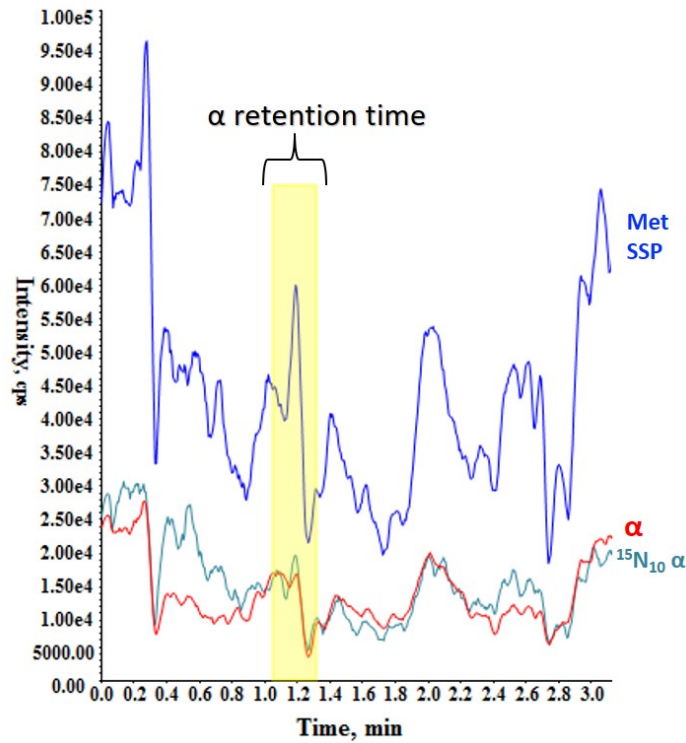

2

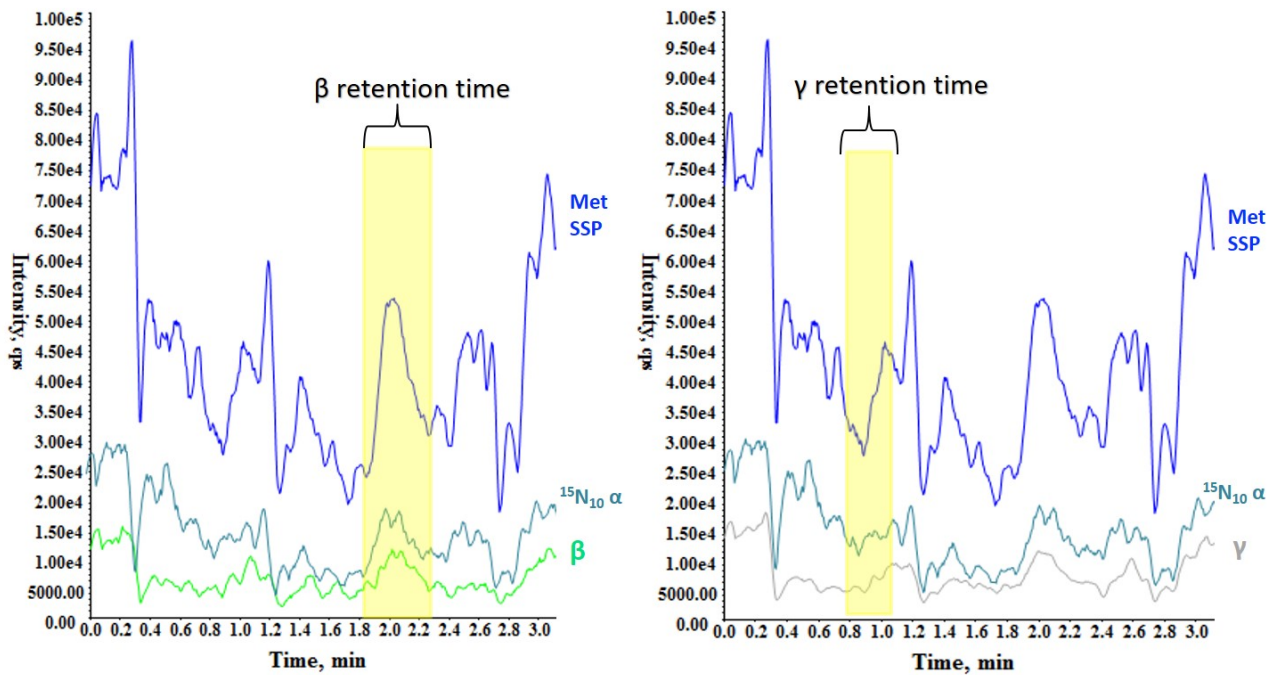

3

4

5 **Supplemental Figure 1.** Post column infusion chromatograms of the two different candidate internal  
6 standards ( $^{15}\text{N}_{10}$ - $\alpha$ -amanitin and methoinine sulfoxide synthetic peptide [MetSSP]) with each analyte ( $\alpha$ -  
7  $\beta$ -, and  $\gamma$ -amanitin) in one individual urine matrix. The expected retention time for each analyte is  
8 highlighted in yellow.

9

10

11
